# Supplementary material for: Photo-enhanced metal-assisted chemical etching of α-gallium oxide grown by halide vapor-phase epitaxy on a sapphire substrate and its applications
Source: Royal Society of Chemistry journal article supplement (doi:10.1039/d3ma00424d), 2023-01-01
Supplement: d3ma00424d1.pdf [file d3ma00424d1.pdf]

Electronic Supplementary Material (ESI) for Materials Advances.

This journal is © The Royal Society of Chemistry 2023

### Supplementary Information

#### **Photo-enhanced Metal-assisted Chemical Etching of $\alpha$ -Gallium Oxide Grown by Halide Vapor-Phase Epitaxy on a Sapphire Substrate and its Applications**

Woong Choi,<sup>a</sup> Dae-Woo Jeon,<sup>b</sup> Ji-Hyeon Park,<sup>b</sup> Dongryul Lee,<sup>c</sup> Soobeen Lee,<sup>a</sup> Kwang Hyeon Baik<sup>d</sup> and Jihyun Kim<sup>a, †</sup>

<sup>a</sup>Department of Chemical and Biological Engineering, Seoul National University, Seoul 08826, South Korea

<sup>b</sup>Korea Institute of Ceramic Engineering and Technology, Jinju 52851, South Korea

<sup>c</sup>Department of Chemical and Biological Engineering, Korea University, Seoul 02841, South Korea

<sup>d</sup>Department of Materials Science and Engineering, Hongik University, Jochiwon, Sejong 30016, South Korea

**†Corresponding author:** Jihyun Kim ([jihyunkim@snu.ac.kr](mailto:jihyunkim@snu.ac.kr))

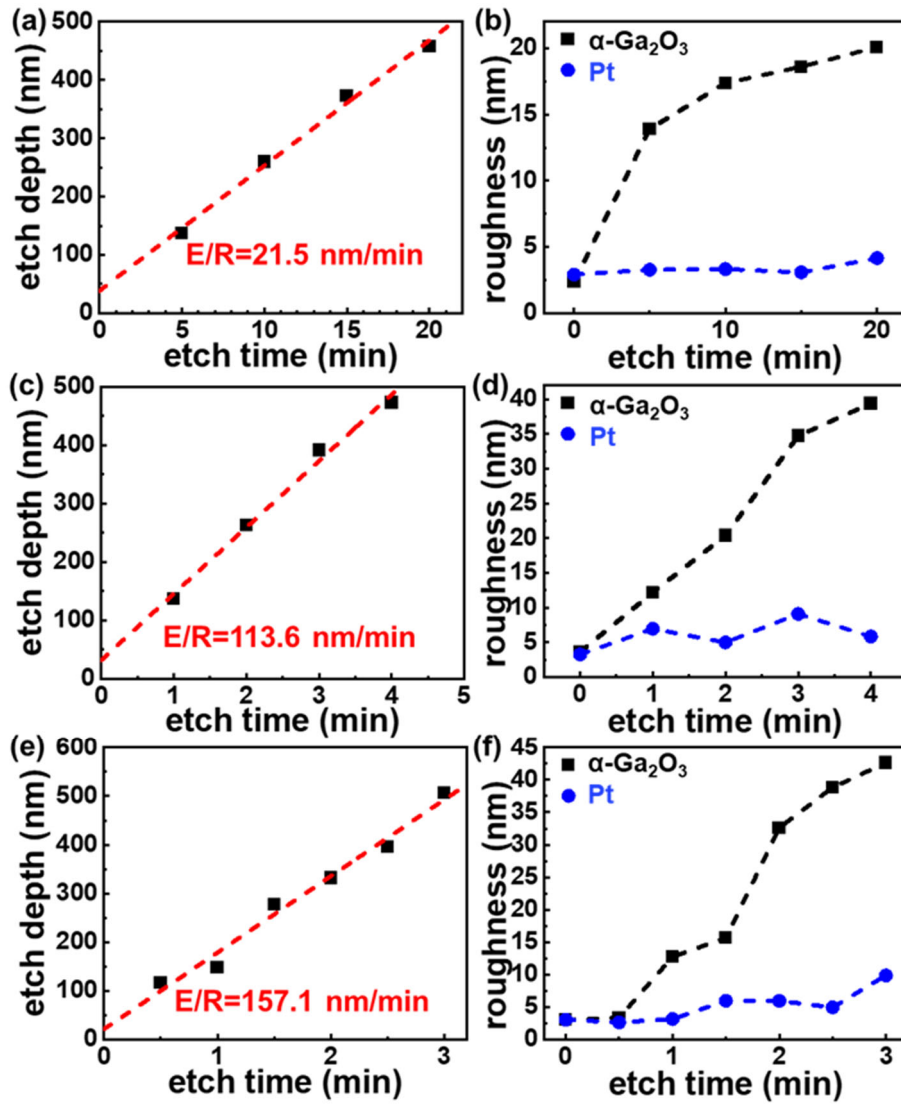

**Figure S1.** (a) Etch rate (E/R) of PE-MAC etch of  $\alpha\text{-Ga}_2\text{O}_3$  at 32 °C. (b) RMS roughness changes at 32 °C etching. (c) Etch rate (E/R) of PE-MAC etch of  $\alpha\text{-Ga}_2\text{O}_3$  at 45 °C. (d) RMS roughness changes in 45 °C etching. (e) Etch rate (E/R) of PE-MAC etch of  $\alpha\text{-Ga}_2\text{O}_3$  at 50 °C. (f) RMS roughness changes in 50 °C etching.

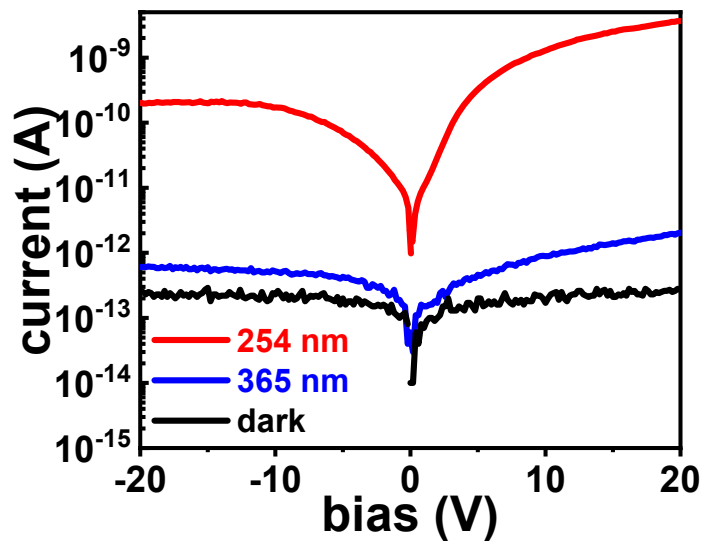

**Figure S2.**  $I$ - $V$  characteristics of  $\alpha$ - $\text{Ga}_2\text{O}_3$  PD under dark condition as well as 254 and 365 nm lights illuminations.
